# Supplementary material for: Low-Tech, Pilot Scale Purification of a Recombinant Spider Silk Protein Analog from Tobacco Leaves
Source: Int J Mol Sci. 2016 Oct 9;17(10):1687. doi: 10.3390/ijms17101687 (PMC5085719; doi:10.3390/ijms17101687)
Supplement: Supplementary file 1 [file ijms-17-01687-s001.pdf]

# Supplementary Material: Low-Tech, Pilot Scale Purification of a Recombinant Spider Silk Protein Analog from Tobacco Leaves

René Heppner, Nicola Weichert, Angelika Schierhorn, Udo Conrad and Markus Pietzsch

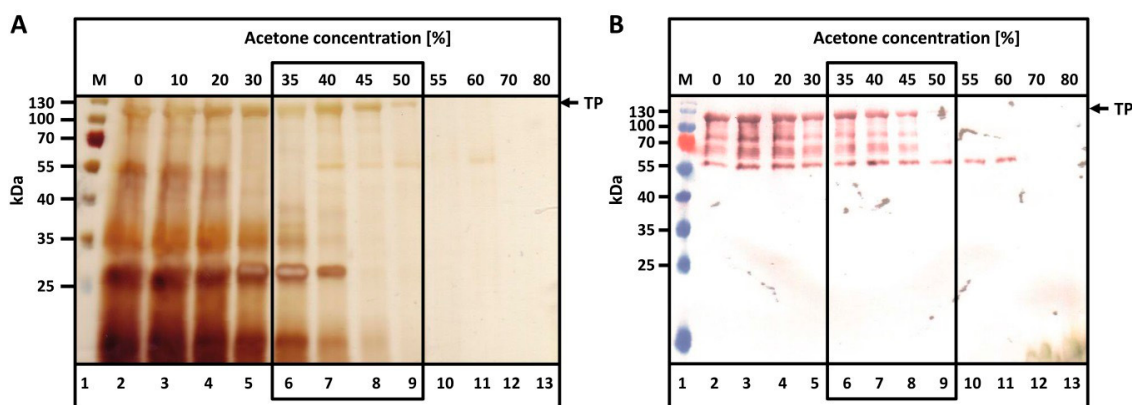

**Figure S1.** Pre-experiment for fractionating acetone precipitation. In 250  $\mu$ L suspension of disrupted tobacco leaves (BWM1) in disruption buffer the respective acetone concentration was adjusted by mixing with an acetone-dH<sub>2</sub>O-mixture (1.0 mL). After incubation (30 min, 4 °C) the suspension was centrifuged and 1 mL of the supernatant was dried. Following, the dry content was resolubilized in 440  $\mu$ L SDS-PAGE sample buffer and boiled (5 min, 99 °C), and the samples were analyzed via SDS-PAGE. Marked with a rectangle is the range of acetone concentration which was investigated in the small scale experiment. TP-target protein (K-MaSp1-100 $\times$  ELP); (A) Silver stained gel; (B) Western Blot. The arrow indicates the molecular size of the target protein (TP).

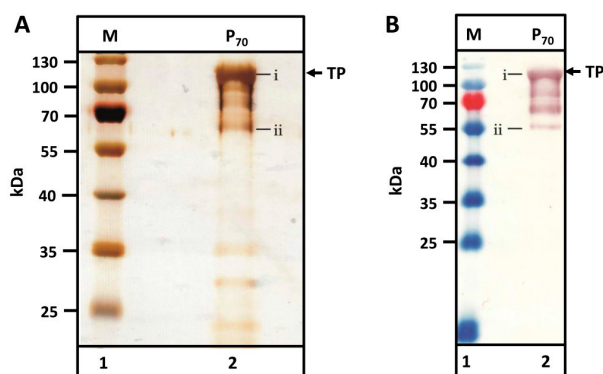

**Figure S2.** LC-ESI-MS samples. After SDS-PAGE, two bands (i and ii) were cut out of after detection on a Coomassie stained gel. Following, a tryptic digestion was performed, and the resulting sample was analyzed via LC-ESI-MS. TP-target protein (K-MaSp1-100 $\times$  ELP); (A) Silver stained gel; (B) Western Blot; M-Prestained protein ladder; P<sub>70</sub>-Resulting pellet after precipitation at 70% (v/v) acetone. The arrow indicates the molecular size of the target protein (TP).

[illegible]
